# 1 **A Joint Deep Learning Model for Simultaneous Batch Effect Correction, Denoising** 2 **and Clustering in Single-Cell Transcriptomics**

3 Justin Lakkis<sup>1,\*</sup>, David Wang<sup>2</sup>, Yuanchao Zhang<sup>1</sup>, Gang Hu<sup>3</sup>, Kui Wang<sup>4</sup>, Huize Pan<sup>5</sup>, Lyle Ungar<sup>6</sup>, Muredach  
4 P. Reilly<sup>5</sup>, Xiangjie Li<sup>7,\*</sup>, Mingyao Li<sup>1,\*</sup>

5 1. Department of Biostatistics, Epidemiology and Informatics, Perelman School of Medicine, University of  
6 Pennsylvania, Philadelphia, PA 19104, USA.

7 2. Graduate Group in Genomics and Computational Biology, Perelman School of Medicine, University of  
8 Pennsylvania, Philadelphia, PA 19104, USA.

9 3. School of Statistics and Data Science, Key Laboratory for Medical Data Analysis and Statistical Research  
10 of Tianjin, Nankai University, Tianjin 300071, China.

11 4. Department of Information Theory and Data Science, School of Mathematical Sciences and LPMC,  
12 Nankai University, Tianjin 300071, China.

13 5. Division of Cardiology, Department of Medicine, Columbia University Irving Medical Center, New York,  
14 NY 10032, USA.

15 6. Department of Computer and Information Science, School of Engineering and Applied Sciences,  
16 University of Pennsylvania, Philadelphia, PA 19104, USA.

17 7. State Key Laboratory of Cardiovascular Disease, Fuwai Hospital, National Center for Cardiovascular  
18 Diseases, Chinese Academy of Medical Sciences and Peking Union Medical College, Beijing 100037, China.

19

## 20 **\*Correspondence:**

21 Justin Lakkis (jlakkis@penncmedicine.upenn.edu)

22 Xiangjie Li (xiangjie631@outlook.com)

23 Mingyao Li, Ph.D. (mingyao@penncmedicine.upenn.edu)

## 24 **Abstract**

25 Recent development of single-cell RNA-seq (scRNA-seq) technologies has led to enormous biological  
26 discoveries. As the scale of scRNA-seq studies increases, a major challenge in analysis is batch effect, which  
27 is inevitable in studies involving human tissues. Most existing methods remove batch effect in a low-  
28 dimensional embedding space. Although useful for clustering, batch effect is still present in the gene  
29 expression space, leaving downstream gene-level analysis susceptible to batch effect. Recent studies have  
30 shown that batch effect correction in the gene expression space is much harder than in the embedding  
31 space. Popular methods such as Seurat3.0 rely on the mutual nearest neighbor (MNN) approach to  
32 remove batch effect in the gene expression space, but MNN can only analyze two batches at a time and  
33 it becomes computationally infeasible when the number of batches is large. Here we present CarDEC, a  
34 joint deep learning model that simultaneously clusters and denoises scRNA-seq data, while correcting  
35 batch effect both in the embedding and the gene expression space. Comprehensive evaluations spanning  
36 different species and tissues showed that CarDEC consistently outperforms scVI, DCA, and MNN. With  
37 CarDEC denoising, those non-highly variable genes offer as much signal for clustering as the highly variable  
38 genes, suggesting that CarDEC substantially boosted information content in scRNA-seq. We also showed  
39 that trajectory analysis using CarDEC's denoised and batch corrected expression as input revealed marker  
40 genes and transcription factors that are otherwise obscured in the presence of batch effect. CarDEC is  
41 computationally fast, making it a desirable tool for large-scale scRNA-seq studies.

## 42 **Introduction**

43 Single-cell RNA sequencing (scRNA-seq) analysis has substantially advanced our understanding of cellular  
44 heterogeneity and transformed biomedical research. However, the analysis of scRNA-seq data remains  
45 confounded by batch effects, which are inevitable in analyses of human tissue and are prevalent in many  
46 scRNA-seq studies in general<sup>1,2</sup>. Several methods have been developed to remove batch effect in scRNA-  
47 seq data analysis<sup>3-10</sup>. These methods can be divided into two categories: 1) batch correction in the low-  
48 dimensional embedding space, and 2) batch correction in the original gene expression space. Most  
49 published papers belong to the first category<sup>3,7-10</sup>. Although useful for profiling the overall characteristics  
50 of cells such as clustering and trajectory reconstruction, these methods cannot be used for downstream  
51 gene-level analysis like differential expression and co-expression analysis.

52  
53 A recent benchmarking study has shown that correcting batch effect in the gene expression space is much  
54 more challenging than in the embedding space<sup>11</sup>. Popular methods such as Seurat 3.0<sup>6</sup> rely on the mutual  
55 nearest neighbor (MNN) approach<sup>5</sup> to remove batch effect in the gene expression space, but MNN can  
56 only analyze two batches at a time. Its performance is affected by the ordering in which batches are  
57 corrected and it quickly becomes computationally infeasible when the number of batches gets large.  
58 Moreover, our evaluations indicate that MNN performs poorly for removing batch effect for genes that  
59 are not highly variable. Another popular method, scVI, suffers from a similar issue in which the denoised  
60 gene expression is still susceptible to batch effect, particularly for those genes that are not highly variable.  
61 Non-highly variable genes represent the majority of genes in the genome, where batch effects constitute  
62 a larger fraction of variance in the transcriptome and are much harder to correct.

63  
64 To address this gap in the literature, we present CarDEC (Count adapted regularized Deep Embedded  
65 Clustering), a joint deep learning framework for simultaneous batch effect correction, denoising, and

66 clustering of scRNA-seq data. Rather than explicitly modeling batch effect, CarDEC jointly optimizes its  
67 reconstruction loss with a self-supervised clustering loss. By minimizing a clustering loss iteratively, the  
68 batch effect in the embedding is reduced and cell type signal is improved<sup>3</sup>. The denoised gene expression  
69 values, computed from this embedding using a decoder, are then corrected for batch effects as well. To  
70 address the difficulty of batch correcting genes that are not highly variable, which suffer from a lower cell  
71 type signal-to-noise ratio, we designed CarDEC using a branching architecture that treats highly variable  
72 genes (HVGs) and the remaining genes, which we designate as lowly variable genes (LVGs), as distinct  
73 feature blocks.

74  
75 CarDEC is unique among batch effect correction methods in that it implicitly corrects for batch effect  
76 through joint optimization of its dual objective function, rather than explicitly modeling batch effect using  
77 batch indicators as in methods such as MNN<sup>5</sup> and scVI<sup>4</sup>. Moreover, it corrects batch effect both in the low-  
78 dimensional embedding space and the original gene expression space. CarDEC's architecture is uniquely  
79 founded on the idea of treating HVGs and LVGs as different "feature blocks," which enables CarDEC to  
80 use the HVGs to drive the clustering loss, while still allowing the LVG reconstructions to depend on the  
81 rich, batch corrected embedding learned from the HVGs, to help remove batch effect in the LVGs. Through  
82 comprehensive analyses on numerous datasets spanning different species and tissues with various  
83 degrees of complexities, we show that CarDEC is effective in removing complex batch effect and  
84 consistently outperforms scVI<sup>4</sup>, DCA<sup>12</sup>, MNN<sup>5</sup>, and scDeepCluster<sup>13</sup> for both batch effect correction and  
85 clustering accuracy. We also show that with appropriate denoising and batch effect correction, the LVGs  
86 offer as much signal for clustering as the HVGs. Furthermore, the effective batch effect correction in gene  
87 expression offered by CarDEC allows it to reveal biologically anticipated marker genes in trajectory  
88 analysis that are otherwise obscured in the presence of batch effect by other methods.

89

## 90 **Results**

### 91 **Overview of CarDEC and evaluation**

92 An outline of the CarDEC workflow is shown in **Figure 1** and **Supplementary Figure 1**. CarDEC starts by  
93 data preprocessing and pretraining of an autoencoder using HVGs with a mean squared error  
94 reconstruction loss function. After pretraining, the weights learned from the pretrained autoencoder are  
95 transferred over to the main CarDEC model, which treats HVGs and LVGs as different feature blocks. The  
96 main CarDEC loss function is a weighted combination of the reconstruction losses for the HVGs and the  
97 LVGs, and a self-supervised clustering loss function driven by the HVGs. This combined loss function allows  
98 CarDEC to preserve local structure of the data during clustering<sup>14</sup>. By minimizing this self-supervised  
99 combined loss function, CarDEC not only improves the low-dimensional embedding for clustering, but the  
100 reconstructed genewise features, which are computed as a function of the low-dimensional embedding,  
101 is also denoised and batch effect corrected, leading to dramatically improved gene expression quality.

102

103 We evaluated CarDEC on a diverse set of challenging real datasets that range from human to mouse and  
104 have different flavors of batch effect. In our evaluations, we wish to assess two properties of CarDEC: 1)  
105 its ability to recover biological signals in the data, and 2) its ability to remove spurious technical signals  
106 driven by batch effect. An ideal method should strive to remove batch effect while maintaining true  
107 biological variations. We compared CarDEC with several state-of-the-art scRNA-seq methods for  
108 denoising, batch effect correction, and clustering. scVI<sup>4</sup> and DCA<sup>12</sup> are multi-use methods that provide  
109 denoised counts in the gene expression feature space, and also a low-dimensional embedding that can be  
110 used for tasks like clustering and visualization. scVI also attempts to correct for batch effect by  
111 conditioning on batch annotation when modeling the denoised counts from a zero-inflated negative  
112 binomial distribution. MNN<sup>5</sup> is a batch correction method that merges batches in a pairwise manner and

113 generates batch corrected gene expression on a cosine scale. scDeepCluster<sup>13</sup> is a clustering method that  
114 also draws inspiration from the self-supervised clustering loss<sup>14</sup>.

115

116 To measure the degree of batch mixing, we examined the batchwise centroids before and after denoising  
117 and/or batch correction for each method by calculating a coefficient of variation (CV) metric. For each  
118 gene, the CV is calculated using the centroid of each batch. A higher value of CV corresponds to greater  
119 variation of gene expression among batches and less batch mixing, whereas a good batch effect removal  
120 method should drive the CV value close to zero.

121

## 122 **Application to human pancreatic islet data from four protocols**

123 A unique feature of CarDEC is the branching architecture for both the HVGs and the LVGs. To demonstrate  
124 that this architecture is key in removing batch effect, we combined four datasets on human pancreas  
125 generated using Fluidigm C1<sup>15</sup>, SMART-seq<sup>216</sup>, CEL-seq<sup>17</sup>, and CEL-seq<sup>218</sup>. The branching architecture was  
126 designed with two objectives in mind. First, we wish to show that when correcting batch effect and  
127 denoising both the HVGs and the LVGs, using a branching model that treats these feature blocks  
128 differently improves the quality of denoised expression values relative to a naïve architecture that treats  
129 these feature blocks the same. Second, we hope to design a model architecture such that including the  
130 LVGs in the model does not worsen denoising and batch effect correction quality of the HVGs, relative to  
131 a naïve model that only denoises the HVGs and does not attempt to denoise LVGs.

132

133 As shown in **Figure 2**, the branching architecture posts significant performance boosts over the naïve  
134 architecture that treated all genes as the same feature block in the input. The branching architecture  
135 performed better for denoising both the HVGs (Adjusted Rand Index (ARI) of 0.93 over 0.72) and the LVGs  
136 (ARI of 0.83 over 0.67) relative to the naïve architecture (**Figure 2a,b**), underscoring the necessity of using

137 the branching architecture to denoise all genes as efficiently as possible. We also observed that for the  
138 purpose of denoising and batch correcting only the HVGs, the branching architecture performed just as  
139 well as a naïve model that only included the HVGs and completely discarded the LVGs (ARI of 0.93 vs 0.94)  
140 (**Figure 2a,c**). This verifies that the branching architecture does not trade off denoising and batch  
141 correction effectiveness on the HVGs at all to denoise the LVGs. Additionally, the denoised counts from  
142 CarDEC showed considerably less batch effect compared to denoised expression from scVI and batch  
143 corrected expression from MNN (**Supplementary Figure 2**). We also noticed that the clustering accuracies  
144 are similar for denoised values and embedding for CarDEC, but the clustering accuracy is much lower  
145 when using denoised values as input than using embedding for scVI (**Supplementary Figure 3**). Strikingly,  
146 the ARI for scVI with denoised gene expression as input is even lower than that when using raw read  
147 counts as input (**Supplementary Figure 4**). This result suggests that batch effect correction in the gene  
148 expression space is much harder than in the embedding space, consistent with the findings of Lucken *et*  
149 *al.*<sup>11</sup>.

150

### 151 **Application to macaque retina data with multi-level batch effect**

152 After finalizing the CarDEC architecture, we next evaluated the performance of CarDEC on a macaque  
153 retina dataset<sup>19</sup>. This dataset poses a great challenge for batch effect correction and denoising because it  
154 features a strong, multi-level batch effect, with cells sequenced from two different regions, four different  
155 macaques, and thirty different samples (**Supplementary Figure 5**).

156

157 For the task of denoising and batch effect correction in the gene expression space, CarDEC was again the  
158 best performing method (**Figure 3, Supplementary Figures 6 and 7**), and the gap in performance between  
159 CarDEC and other methods is even larger on this more challenging dataset. CarDEC not only removed the  
160 multi-level batch effect but also preserved inter-cell type variation. Notably, the ARI for clustering using

161 the LVG denoised and batch effect corrected counts from CarDEC is 0.98 (**Figure 3b**), which is as high as  
162 that using the HVGs (**Figure 3a**). As a comparison, the ARI is only 0.15 using the LVG raw counts as input  
163 for clustering (**Supplementary Figure 5**). This suggests that the denoising and batch correction in CarDEC  
164 substantially boosted the signal-to-noise ratio in the LVGs. Moreover, CarDEC's genewise CVs are  
165 consistently the closest to zero, providing evidence that cells were mixed well by batch (**Figure 3c**,  
166 **Supplementary Figure 8**).

167  
168 The other methods all struggled with batch effect in the denoised counts. scVI largely failed to correct  
169 batch effect: when using scVI batch corrected counts, the cells were separated primarily by batch rather  
170 than by cell type. For the LVGs, its ARI is even lower than that using the LVG raw counts as input for  
171 clustering (scVI 0.09 vs raw 0.15) (**Figure 3b**, **Supplementary Figure 5**). DCA had slightly higher ARIs than  
172 scVI for both the HVGs and the LVGs, although both are significantly lower than CarDEC (**Figure 3a,b**).  
173 MNN performed much better than scVI and DCA for batch correcting the HVG counts, achieving an ARI of  
174 0.86 (**Figure 3a**). However, it still fell substantially short of CarDEC for this evaluation (CarDEC ARI 0.98).  
175 Looking more closely at the HVG UMAP plots, the batches were mixed less thoroughly with MNN than  
176 they were for CarDEC, and the cells were separated less by cell type indicating that MNN failed to  
177 completely recover cell type variation. This is further confirmed by the genewise CV density plot in which  
178 the MNN density curve is further away from zero than CarDEC (**Figure 3c**). For removing batch effects in  
179 the LVG counts, MNN again was the worst performing method because it removed nearly all biological  
180 variations, leaving only batch effects.

181  
182 For the simpler task of clustering using embedding, existing methods did considerably better than they  
183 did at batch effect correction in the gene expression space but still fell short of CarDEC (**Figure 3d**,  
184 **Supplementary Figure 9**). CarDEC achieved an ARI nearly 1 for clustering using the embedding.



185 scDeepCluster and scVI performed slightly better than Louvain's algorithm using raw HVGs, but still fell  
186 short of achieving 0.75 ARI. DCA struggled on this dataset with an ARI of only 0.25.

187

### 188 **Application to mouse cortex and PBMC data from four protocols**

189 We next compared different methods using a mouse cortex dataset<sup>20</sup>. This dataset poses the greatest  
190 challenge for batch correction and denoising on two fronts (**Supplementary Figure 10**). First, it exhibits  
191 very serious batch effects owing to the fact that cells were generated using four different scRNA-seq  
192 protocols. Furthermore, this dataset is heavily dominated by excitatory and inhibitory neurons, and the  
193 other cell types are rare, so preserving biological variation is especially imperative for detecting and  
194 analyzing these rarer subpopulations.

195

196 For the task of denoising and batch correcting the gene expression space CarDEC performed considerably  
197 better than the other methods (**Figure 4**). CarDEC performed the best at balancing between removing  
198 batch effect while preserving as much cell type variability as possible. The ARIs are similar when using the  
199 HVG denoised counts and the LVG denoised counts as input for clustering (**Figure 4a,b**). As a comparison,  
200 the ARIs are only 0.26 and 0.25 when using the HVG and the LVG raw counts as input for clustering,  
201 respectively (**Supplementary Figure 10**). The relatively low ARI when using the HVG raw count as input  
202 for clustering demonstrates the strong batch effect in this dataset. However, for this challenging dataset,  
203 using CarDEC denoised and batch corrected LVG counts, the ARI increased to 0.74, suggesting that CarDEC  
204 substantially boosted the signal-to-noise ratio in the LVGs by simultaneous denoising and batch effect  
205 removal. The genewise CVs for CarDEC are also the closest to zero among all methods (**Figure 4c**).

206

207 By contrast, DCA and scVI largely failed for this dataset (**Figure 4a,b**). For both the HVGs and the LVGs,  
208 DCA and scVI separated the cells purely by scRNA-seq protocol with no mixing of cells from different

209 batches. After denoising using DCA and scVI, cell variation was driven entirely by batch, rendering the  
210 denoised counts ineffective for downstream analyses. Consistent with our previous evaluations, for batch  
211 correcting the HVGs, MNN was the second-best performer (**Figure 4a**), ahead of other methods by  
212 substantial margins but still lagging relative to CarDEC. MNN did not merge batches to the extent that  
213 CarDEC did and failed to preserve as much cell type variability, causing cell types to mix more. For  
214 removing batch effects in the LVGs, MNN did considerably worse than CarDEC and only slightly better  
215 than DCA and scVI (**Figure 4b**). It suffered from the same problems as DCA and scVI for the LVGs in that  
216 cell type variation was lost and all variability was driven by batch.

217  
218 Even the simpler task of clustering the data using embedding was very difficult on this dataset (**Figure 4d**,  
219 **Supplementary Figure 11**). Both DCA and scVI performed poorly at this task, scoring lower ARIs than a  
220 straightforward application of Louvain's algorithm to the raw data. scDeepCluster showed slightly better  
221 performance, but its ARI still fell below 0.4. For this task, CarDEC also was the clear leader, achieving an  
222 ARI of 0.73.

223  
224 We also analyzed a dataset of human PBMCs from the same paper<sup>20</sup> as the mouse cortex data. This dataset  
225 was similar to the cortex dataset: featuring eight batches spanning five scRNA-seq protocols and the  
226 results were largely the same: CarDEC was the best for denoising/batch correcting the HVGs and far away  
227 the best for denoising/batch correcting the LVGs (**Supplementary Figures 12-14**).

228  
229 **Application to human monocyte data with pseudotemporal structure**

230 We next show the utility of CarDEC for improving trajectory analysis for cells with pseudotemporal  
231 structure. We analyzed a scRNA-seq dataset generated from monocytes derived from human peripheral  
232 blood mononuclear cells by Ficoll separation followed by CD14- and CD16-positive cell selection<sup>3</sup>. This

233 dataset includes 10,878 monocytes from one healthy subject. The cells were processed in three batches  
234 from blood drawn on three different days. Although monocytes can be classified as classical  
235 (CD14<sup>++</sup>/CD16), intermediate (CD14<sup>++</sup>/CD16<sup>+</sup>), and nonclassical patrolling (CD14<sup>-</sup>/CD16<sup>++</sup>) subpopulations  
236 based on surface markers, our previous analysis based on scRNA-seq data indicates that these cells show  
237 continuous transcriptional characteristics and trajectory analysis is an appropriate approach to  
238 characterize them<sup>3</sup>. This dataset has strong batch effect (**Supplementary Figure 15**). To reconstruct the  
239 trajectories of these cells, for each method, we first denoised and/or batch corrected the gene expression  
240 matrix, which was then fed into Monocle 3<sup>21</sup> to estimate the pseudotime of each cell.

241  
242 **Figure 5a** shows that CarDEC yields far and away the best pseudotime analysis results with cells from the  
243 three batches well mixed, and a clear pseudotemporal path emerged. The batchwise density plots show  
244 that the three batches have similar pseudotime distributions, suggesting that CarDEC successfully  
245 removed batch effect. The plots of *FCGR3A* (known marker gene for nonclassical monocytes) and *S100A8*  
246 (known marker gene for classical monocytes) gene expression also showed expected patterns  
247 (**Supplementary Figure 16**). There are two key points of evidence from these marker gene plots suggesting  
248 that CarDEC recovered biological signal. First, for each marker gene, the expression levels are virtually  
249 identical across batches for all pseudotime points, which indicates that batch effect was removed for each  
250 gene expression and pseudotime relationship. Also, *FCGR3A* gene expression decreases monotonically  
251 with pseudotime, while *S100A8* expression increases monotonically with pseudotime. This is exactly the  
252 kind of behavior we expect from these marker genes. Since *FCGR3A* and *S100A8* are markers for the  
253 nonclassical and classical monocytes, respectively, we expect a good pseudotime analysis to segment the  
254 monocytes from nonclassical to classical (or vice versa) and for *FCGR3A* and *S100A8* expressions to be  
255 monotonic function of pseudotime with opposite trends. By denoising and batch correcting gene counts,

256 CarDEC successfully mixed batches and recovered biological signal down to the individual marker gene  
257 level.

258  
259 By contrast, no other methods were able to achieve CarDEC's success in improving pseudotime analysis.  
260 DCA (**Figure 5b**), scVI (**Figure 5c**), and MNN (**Figure 5d**) all failed to mix batches in the UMAP embedding  
261 from Monocle 3, and the pseudotime distribution varied across batches for all three methods.  
262 Furthermore, neither of the marker genes show strong monotonic trends as a function of the pseudotime,  
263 and for each marker gene, the relationship between expression and pseudotime varied by batch. These  
264 issues suggest that DCA, scVI, and MNN's failures to correct for batch effects confounded biological signal  
265 and obscured signals from canonical markers of established subpopulations, *FCGR3A* and *S100A8*, as  
266 marker genes using these approaches.

267  
268 There are other approaches to using these denoising and batch correction methods for pseudotime  
269 analysis. For example, one can subset the denoised and batch corrected matrix to include only the HVGs  
270 and then feed this into Monocle 3 (**Supplementary Figures 17 and 19**). Alternatively, one can use the  
271 embedding from CarDEC, scVI, or DCA as the reduced dimension space to build the Monocle 3 pseudotime  
272 graph (**Supplementary Figures 18 and 20**). In both of these other cases, the conclusions are largely the  
273 same, CarDEC is far and away the best method for improving pseudotime analysis.

274  
275 Next, we examined whether the denoised and batch corrected gene expression values can help improve  
276 gene expression quality for biological discovery. We focused our analyses on 61 transcription factors (TFs)  
277 that were expressed in the monocyte data and also found to be differentially expressed among classical,  
278 intermediate, and nonclassifcal monocytes by Wong *et al.*<sup>22</sup>. Among these 61 TFs, 23 were selected as  
279 HVGs and the remaining 38 were designated LVGs. **Figure 6a** shows that the CarDEC denoised gene

280 expression revealed a gradual decreasing trend from nonclassical to classical for TFs that are known to be  
281 highly expressed in nonclassical monocytes, e.g., *TCF3L2*, *POU2F2*, *CEBPA*, and *HSBP1*. We also observed  
282 expected gene expression increase from nonclassical to classical for TFs that are known to be highly  
283 expressed in classical monocytes, e.g., *NEF2*, *CEBPD*, *GAS7*, and *MBD2*. Notably, some of the TFs with  
284 these expected expression patterns were not selected as HVGs, suggesting that denoising and batch  
285 correction in CarDEC helped recover the true biological variations. By contrast, when using raw UMI  
286 counts as input, the heatmap did not reveal any meaningful biological patterns even for those TFs that  
287 were selected as HVGs (**Figure 6b**).

288  
289 An important task in trajectory analysis is to identify genes whose expression values change over  
290 pseudotime and whether the expression patterns are different between conditions (e.g., healthy vs  
291 diseased) over pseudotime. Avoiding generating false positive results is critical as failure of doing so may  
292 lead to follow-up of a wrong signal. Since the three batches were obtained from the same subject, we do  
293 not expect to detect significant gene expression differences over pseudotime among them. To this end,  
294 we performed differential expression analysis and compared the distribution of gene expression changes  
295 over pseudotime across the three batches. We performed hypothesis tests using the '*gam*' function in R  
296 package *mgcv* and tested whether gene expression patterns for the three batches are significantly  
297 different over pseudotime. **Figure 6c** shows the p-values from this differential expression analysis for each  
298 method. CarDEC is clearly much more effective in removing batch effect than DCA, MNN, and scVI. The  
299 median  $-\log_{10}$  p-value for CarDEC is 3.70, whereas the median  $-\log_{10}$  p-values for DCA, MNN, and scVI  
300 are 322, 7.08, and 323, respectively. These results clearly indicate that failure to correct for batch effect  
301 could lead to a severe inflation of false positive results. **Figure 6d** shows four selected TFs, where the  
302 denoised and batch corrected gene expression for CarDEC agreed well among the three batches, further

303 confirming the effectiveness of CarDEC in removing batch effect in the gene expression space. Gene  
304 expression plots for the remaining 57 TFs are shown in **Supplementary Figure 21**.

305

### 306 **CarDEC is scalable to large dataset**

307 As the scale of scRNA-seq continues to grow, it becomes increasingly important for a method to be  
308 scalable to large datasets. To evaluate the scalability of CarDEC, we leveraged a dataset of 104,694 human  
309 fetal liver cells<sup>23</sup>. Since we are principally interested in the problem of denoising and batch correcting in  
310 the full gene expression space, we retained all 21,521 genes after initial filtering for this analysis. For  
311 CarDEC we benchmarked two variations: a version that provides only denoised/batch corrected  
312 expression in the Z-score space (CarDEC Z-score) and a version that provides denoised/batch corrected  
313 expression in the count space (CarDEC Count).

314

315 We evaluated the runtime needed to process 10%, 20%, 40%, 60%, 80%, and 100% of cells in the human  
316 fetal liver dataset for CarDEC, scVI, DCA, and MNN. All evaluations were done on a 2019 edition MacBook  
317 Pro with 2.4 GHz 8-Core Intel Core i9 CPU and 32 GB of memory. CarDEC, DCA, and scVI were all trained  
318 with early stopping to halt training upon convergence. The results are shown in **Supplementary Figure 22**.

319 Both versions of CarDEC as well as DCA scaled approximately linearly with the number of cells and all  
320 three of these methods finished the analysis in less than 3.5 hours. scVI compared less favorably, as it  
321 took almost 11 hours to process the full dataset. MNN, on the other hand, has serious scalability issues,  
322 which is consistent with a recent benchmarking study<sup>5</sup>. It took over 12 hours to analyze 20% of the dataset,  
323 and over 47 hours to analyze 40% of the dataset. We could not run MNN in under 48 hours using more  
324 than 40% of the data.

325

326

## 327 **Discussion**

328 We developed CarDEC, a joint deep learning model, that removes batch effects not only in the low-  
329 dimensional embedding space, but also across the entire gene expression space. As demonstrated in our  
330 evaluations and a recent benchmarking study<sup>11</sup>, it is considerably harder to correct for batch effect in the  
331 gene expression space than in the embedding space, and especially hard to correct for batch effect in  
332 LVGs, which constitute the majority of the transcriptome. CarDEC was built to tackle these challenges. To  
333 remove batch effect in the gene expression space, we minimize a loss function that combines clustering  
334 and reconstruction losses. The self-supervised clustering loss, driven by HVGs, regularizes the embedding  
335 and removes batch effects in the embedding. The rich, batch corrected embedding is then used to  
336 compute an effectively batch corrected representation in the original gene expression space. To address  
337 the difficulty associated with batch correcting LVGs, we implemented a branching architecture, where  
338 embeddings are computed separately for HVGs and LVGs and where only the HVG embedding is used to  
339 compute the clustering loss. Using the pancreatic islet datasets generated from four scRNA-seq protocols,  
340 we demonstrated that this branching architecture substantially improved batch effect removal on both  
341 the HVG and LVG gene expression spaces, as compared to the naïve architecture.

342  
343 Across a variety of datasets, with batch effects spanning multiple complexities in level and strength we  
344 demonstrated that CarDEC consistently led in its ability to remove batch effects. CarDEC was consistently  
345 the best for removing batch effects in all capacities: in the embedding space, the HVG expression space,  
346 and the LVG expression space. In particular, CarDEC is the only method capable of batch correcting the  
347 LVGs. We showed that with appropriate denoising and batch correction, the LVGs offer as much signal for  
348 clustering as the HVGs, suggesting that CarDEC has substantially boosted the amount of information  
349 content in scRNA-seq. We also demonstrated that by batch correcting gene expression counts, CarDEC

350 improved pseudotemporal analysis of human monocytes, an example of how batch correction can be  
351 used to improve downstream analyses.

352

353 Current scRNA-seq studies often include a large number of cells generated from many samples, across  
354 multiple conditions, and possibly using different protocols. Removing batch effect is critical for data  
355 integration. Since CarDEC provides efficient batch correction in the full gene expression space, it can be  
356 used to for a wide array of analyses to facilitate biological discovery. Harmonized counts in the gene  
357 expression space can be used to estimate unbiased, batch corrected log fold changes, which can be used  
358 to identify marker genes for different cell types. These counts can also be used to reconstruct trajectories  
359 and identify genes showing pseudotemporal patterns. Lastly, CarDEC is computationally fast and memory  
360 efficient, making it a desirable tool for analyses of complex data in large-scale single-cell transcriptomics  
361 studies.



## 362 **Acknowledgements**

363 This work was supported by the following grants: R01GM125301 (to M.L.), R01EY030192 (to M.L.),  
364 R01EY031209 (to M.L.), R01HL113147 (to M.L. and M.P.R.), and R01HL150359 (to M.L. and M.P.R.). We  
365 thank Sean Simmons and Jiarui Ding for their help on the mouse cortex and human PBMC data analysis.

366

## 367 **Author contributions**

368 This study was conceived of and led by M.L.. J.L. designed the model and algorithm, implemented the  
369 CarDEC software, and led data analysis with input from M.L. and X.L.. X.L. led data analysis for the human  
370 monocyte data and designed the workflow figure. D.W., G.H., and K.W. participated the early stage of  
371 algorithm design and testing. Y. Z. provided input on memory management and analysis for the human  
372 monocyte data. L. U. provided input on the model and algorithm design. H.Z. and M.P.R. provided input  
373 on the human monocyte data analysis. J.L. and M.L. wrote the paper with feedback from all coauthors.

374

## 375 **Competing financial interests**

376 The authors declare no competing interests.

## 377 **Figure legends**

378 **Figure 1. The workflow of CarDEC.** The CarDEC workflow can be summarized in four steps that are  
379 depicted here: preprocessing, pretraining, denoising, and optionally, denoising on the count scale.

380

381 **Figure 2. Justification for the branching architecture in CarDEC.** The CarDEC API splits the input matrix  
382 into HVGs and LVGs and treats them separately with a “Branching” architecture as in Fig. 1. Alternatively,  
383 we can use a “Naïve” model for finetuning that treats all features the same regardless of gene expression  
384 variance, which consists of an autoencoder with a clustering loss in addition to the reconstruction loss.  
385 Here we demonstrate the utility of the Branching architecture. The HVGs and LVGs are clustered  
386 separately and the ARI of assignments is provided along with a UMAP plot. First row colored by cell type,  
387 second by scRNA-seq protocol. **a**, Clustering using denoised counts from the CarDEC Branching  
388 architecture. **b**, Clustering using denoised counts from the CarDEC Naïve architecture. All genes (HVGs  
389 and LVGs) were treated the same and denoised together. **c**, Clustering using denoised counts from the  
390 CarDEC Naïve architecture, but using HVGs only in the Naïve model. Since the LVGs were not included in  
391 this scenario, evaluation was only done for denoised expression for the HVGs.

392

393 **Figure 3. Comparison of different methods on the macaque retina dataset.** **a**, UMAP embedding  
394 computed from the denoised HVG counts for each method. Top row colored by cell type; bottom colored  
395 by Macaque ID. UMAPs colored by region id and sample id provided in the supplement. Cells were also  
396 clustered with Louvain’s algorithm. **b**, UMAP embedding computed from the denoised LVG counts for  
397 each method. Figure legends are the same as those in **a**. **c**, Density plot of genewise coefficient of variation  
398 (CV) among batch centroids. Centroids computed with sample id as batch definition. CV plots with region  
399 id and macaque id as batch definition are provided in **Supplementary Figure 9**. **d**, Clustering accuracy  
400 metrics obtained using the embedding based methods to cluster the data, rather than running Louvain on

401 the full gene expression space. Results for “Raw” were run using Louvain’s algorithm on the original HVG  
402 counts, to provide a baseline with which to compare embedding based clustering results to.

403

404 **Figure 4. Comparison of different methods on the mouse cortex dataset. a,** UMAP embedding computed  
405 from the denoised HVG counts for each method. Top row colored by cell type; bottom colored by batch.  
406 Cells are also clustered with Louvain’s algorithm, and resultant ARI is provided. **b,** UMAP embedding  
407 computed from the denoised LVG counts for each method. Figure legends are the same as those in **a.** **c,**  
408 Density plot of genewise coefficient of variation (CV) among batch centroids. **d,** Clustering accuracy  
409 metrics obtained using the embedding based methods to cluster the data, rather than running Louvain on  
410 the full gene expression space. Results for “Raw” were run using Louvain’s algorithm on the original HVG  
411 counts, to provide a baseline with which to compare embedding based clustering results to.

412

413 **Figure 5. Comparison of different methods for pseudotime analysis in the human monocyte data.** The  
414 analysis is for Monocytes derived from three technical replicates from the same subject. For each method,  
415 the full dataset was denoised/batch corrected and then fed to Monocle 3 for pseudotime analysis. We  
416 show the UMAP embedding colored by batch (column 1) and estimated pseudotime (column 2). We also  
417 visualize the kernel density distribution of pseudotime by batch (column 3) and plot the distributions of  
418 marker genes *FCGR3A* and *S100A8* against pseudotime (columns 4 and 5, respectively). **a,** Pseudotime  
419 analysis when using denoised/batch corrected gene expression matrix from CarDEC as input. **b,**  
420 Pseudotime analysis when using denoised gene expression matrix from DCA as input. **c,** Pseudotime  
421 analysis when using denoised/batch corrected gene expression matrix from scVI as input. **d,** Pseudotime  
422 analysis when using batch corrected gene expression matrix from MNN as input.

423

424 **Figure 6. Comparison of different methods for differential expression analysis of transcription factors**  
425 **in the human monocyte data. a,** Heatmap of scaled gene expression for CarDEC. Pseudotime was inferred  
426 based on embedding obtained from CarDEC using Monocle 3. **b,** Heatmap of scaled raw UMI counts.  
427 Pseudotime was inferred based on embedding obtained from the scaled raw UMI counts using Monocle  
428 3. **c,** p-values obtained from differential expression analysis among the three batches over pseudotime.  
429 For each method, the pseudotime was inferred based on embedding obtained from the corresponding  
430 method. The red dotted line corresponds to p-value = 0.01. The top panel is for the 23 HVG TFs and the  
431 bottom panel is for the 38 LVG TFs. **d,** Denoised and batch corrected gene expression for CarDEC, denoised  
432 gene expression for DCA, batch corrected gene expression for MNN, and denoised and batch corrected  
433 gene expression for scVI over pseudotime for four selected TFs, *HIF1A*, *HES4*, *HSBP1*, and *GAS7*. For each  
434 method, the pseudotime was inferred based on embedding from the corresponding method.

## 435 **Methods**

436 The CarDEC workflow (**Figure 1, Supplementary Figure 1**) involves four steps: preprocessing, pretraining,  
437 gene expression denoising in Z-score space, and (optionally) denoising in count space. Below we briefly  
438 describe each of these steps. Details of the implementation is described in **Supplementary Note 1**, and  
439 the hyperparameters of CarDEC are shown in **Supplementary Table 1**.

440

### 441 **Step 1: preprocessing**

442 We first remove any cells expressing less than 200 genes, and then remove any genes expressed in less  
443 than 30 of the remaining cells. Let  $\mathbf{X}$  be an  $n \times p$  gene count matrix with  $n$  cells and  $p$  genes after filtering.  
444 The gene expression values are normalized. In the first step, cell level normalization is performed in which  
445 gene expression for a given gene in each cell is divided by the total gene expression across all genes in the  
446 cell, multiplied by 10,000, and then transformed to a natural log scale. In the second step, gene level  
447 normalization is performed in which the cell level normalized values for each gene are standardized by  
448 subtracting the mean and dividing by the standard deviation across all cells within the same batch for the  
449 given gene. Highly variable genes (HVGs) are selected based on the log-normalized counts using the  
450 approach introduced by Stuart and Butler<sup>24</sup> and implemented in the “pp.highly\_variable\_genes” function  
451 with “batch\_key” parameter in the Scanpy package (version  $\geq 1.4$ )<sup>25</sup>. The remaining genes that are not  
452 selected as HVGs are considered lowly variable genes (LVGs). We note that many of the LVGs still show  
453 cell-to-cell variability, and are useful for clustering analysis after appropriate denoising and batch effect  
454 correction. We select 2,000 HVGs for all analyses in this paper.

455

### 456 **Step 2: pretraining using the HVGs**

457 The pretraining step is a straightforward implementation of an autoencoder. Let  $p_{HVG}$  be the number of  
458 HVGs selected in Step 1, and  $\mathbf{Y}_{HVG}$  be the corresponding  $n \times p_{HVG}$  matrix of normalized expression,

459 subsetting to include only the HVGs. Define a standard autoencoder for  $\mathbf{Y}_{HVG}$  with encoder and decoder  
460 represented by  $f_{E,HVG}(\cdot; W_{E,HVG})$  and  $f_{D,HVG}(\cdot; W_{D,HVG})$ , respectively. The weights  $W_{E,HVG}$  and  
461  $W_{D,HVG}$  are randomly initialized using the glorot uniform approach, and are tuned during pretraining. We  
462 use the tanh activation for the output of the encoder, and the linear activation function for the output of  
463 the decoder. For all intermediate hidden layers in the encoder and decoder, we use the ReLU activation  
464 function. The autoencoder is pretrained with mean squared error loss using minibatch gradient descent  
465 with the Adam optimizer<sup>26</sup>.

466

### 467 **Step 3: denoising Z-scores**

468 In this step, we use an expanded, branching architecture to accommodate LVGs, and introduce a  
469 clustering loss that regularizes the embedding and improves batch mixing and denoising especially in the  
470 gene space. Let  $p_{LVG}$  be the number of LVGs selected in Step 1, and  $\mathbf{Y}_{LVG}$  be the corresponding  $n \times p_{LVG}$   
471 matrix of normalized expression, subsetting to include only the LVGs, and  $\mathbf{y}_{i,HVG}$  and  $\mathbf{y}_{i,LVG}$  be the vectors  
472 of HVGs and LVGs, respectively in cell  $i$ . We retain the encoder and decoder mappings for HVGs,  
473  $f_{E,HVG}(\cdot; W_{E,HVG})$  and  $f_{D,HVG}(\cdot; W_{D,HVG})$  from Step 2, including the learnt weights  $W_{E,HVG}$  and  
474  $W_{D,HVG}$ . We introduce a clustering layer that takes the HVG embedding  
475  $\mathbf{z}_{i,HVG} = f_{E,HVG}(\mathbf{y}_{i,HVG}; W_{E,HVG})$  as input and returns for each cell a vector of cluster membership  
476 probabilities for  $h$  clusters, where  $h$  is a user specified number. For this clustering layer, we introduce an  
477  $h \times d$  matrix of trainable weights/cluster centroids  $\mathbf{M}$ , where the  $j^{th}$  row of  $\mathbf{M}$  is a cluster centroid  $\boldsymbol{\mu}_j$ ,  
478 and  $d$  is dimension of the embedding.

479

480 To initialize  $\mathbf{M}$ , we run Louvain's algorithm on the embeddings  $\{\mathbf{z}_{i,HVG}: i \in \{1, 2, \dots, n\}\}$  learned from the  
481 pretrained autoencoder, and find the cluster centroid for each cluster. The clustering layer computes a  
482 vector of cluster membership probabilities for cell  $i$ , denoted by  $\mathbf{q}_i$ . Let  $q_{ij}$ , the  $j^{th}$  element of  $\mathbf{q}_i$ , denote

483 the probability that cell  $i$  belongs to cluster  $j$ . Then the membership probabilities are computed using a  $t$ -  
484 distribution kernel as follows,

485

$$486 \quad q_{ij} = \frac{\left(1 + \|\mathbf{z}_{i,HVG} - \mu_j\|^2\right)^{-1}}{\sum_{j'} \left(1 + \|\mathbf{z}_{i,HVG} - \mu_{j'}\|^2\right)^{-1}}$$

487

488 Since we do not have cell type labels in an unsupervised analysis, we create “pseudo-labels” that can be  
489 used in place of real labels for optimizing clustering weights. Inspired by Xie *et al.*<sup>27</sup>, these pseudo-labels  
490 are computed from the membership probabilities  $q_{ij}$  as follows,

491

$$492 \quad p_{ij} = \frac{q_{ij}^2 / \sum_i q_{ij}}{\sum_{j'} q_{ij'}^2 / \sum_i q_{ij'}}$$

493

494 Let  $\mathbf{p}_i$  be an  $h$ -dimensional vector whose  $j^{\text{th}}$  element is  $p_{ij}$ . Then the clustering loss for cell  $i$  is defined as  
495 the following Kullback–Leibler divergence (KLD),

496

$$497 \quad l_{i,c} = KLD(\mathbf{p}_i || \mathbf{q}_i) = \sum_j p_{ij} \log\left(\frac{p_{ij}}{q_{ij}}\right)$$

498

499 This loss is a component of the total loss defined later. Since it takes the embedding vectors  $\mathbf{z}_{i,HVG}$  as  
500 input, minimizing this objective function can refine the embedding and help to remove batch effects from  
501 denoised counts computed using this embedding as input.

502

503 We also introduce encoder and decoder mappings  $f_{E,LVG}(\cdot; W_{E,LVG})$  and  $f_{D,LVG}(\cdot; W_{D,LVG})$  to address  
504 the problem of denoising and batch correction for the LVGs. Unlike the HVG decoder  $f_{D,HVG}$ , the LVG  
505 decoder  $f_{D,LVG}(\cdot; W_{D,LVG})$  does not map the low-dimension embedding  $\mathbf{z}_{i,LVG}$  alone to reconstruct  
506  $\hat{\mathbf{y}}_{i,LVG}$  in the original  $p_{LVG}$ -dimension space. Rather, we concatenate the HVG and LVG embeddings  
507 together, and feed the combined vector  $[\mathbf{z}_{i,HVG} \ \mathbf{z}_{i,LVG}]$  into the decoder to denoise and batch correct  
508 LVG expression in the original  $p_{LVG}$ -dimension space. That is,

509

$$510 \quad \hat{\mathbf{y}}_{i,LVG} = f_{D,LVG}([\mathbf{z}_{i,HVG} \ \mathbf{z}_{i,LVG}]; W_{D,LVG}).$$

511

512 This concatenated embedding is critical because it allows CarDEC to only use the high signal-to-noise ratio  
513 HVGs to drive the clustering loss, while still using the rich, batch corrected embedding that is refined using  
514 this clustering loss to denoise and batch correct LVGs. The activation functions for the encoder and  
515 decoder of the LVGs are similarly defined as the autoencoder in Step 2.

516

517 To train this branching model, we first introduce two reconstruction losses, one for the HVGs and one for  
518 the LVGs computed as follows for cell  $i$ ,

519

$$520 \quad l_{i,HVG} = \frac{1}{p_{HVG}} \|\hat{\mathbf{y}}_{i,HVG} - \mathbf{y}_{i,HVG}\|^2$$

$$521 \quad l_{i,LVG} = \frac{1}{p_{LVG}} \|\hat{\mathbf{y}}_{i,LVG} - \mathbf{y}_{i,LVG}\|^2$$

522

523 Then the total loss is calculated as a multi-component loss function as follows,

524

$$525 \quad l_i = \alpha l_{i,c} + (2 - \alpha) \frac{l_{i,HVG} + l_{i,LVG}}{2},$$



526

527 where  $\alpha$  is a hyperparameter ranging from 0 to 2 that balances reconstruction loss with clustering loss.

528 We set  $\alpha$  at 1 as default value. The total loss is minimized in an iterative fashion until certain convergence

529 criteria are satisfied.

530

#### 531 **Step 4: denoising gene expression counts**

532 In Step 3, the denoised expression values obtained from the decoder are on a Z-score scale and are not

533 naturally comparable to raw UMI counts. To remedy this, we offer an optional downstream modeling step

534 that provides denoised expression values on the original count scale. This strategy involves finding mean

535 and dispersion parameters that maximize a negative binomial likelihood. We choose the negative

536 binomial distribution because previous studies have shown that UMI counts are not zero-inflated, and

537 negative binomial fits the data well<sup>28-30</sup>.

538

539 After the training in Step 3, we have obtained batch corrected low-dimension embeddings,  $\mathbf{z}_{i,HVG}$  and

540  $\mathbf{z}_{i,LVG}$  for each cell  $i$  from the fine-tuned HVG and LVG encoders. We will use two separate neural

541 networks to maximize the negative binomial losses: one for the HVGs and one for the LVGs. These models

542 are completely separate from one another but are trained almost identically with only minor differences.

543 The goal is to map the embeddings into the full gene space to obtain mean and dispersion parameters for

544 each gene. Without loss of generality, we use the HVGs as an example to illustrate how the neural network

545 is built.

546

547 The vector of genewise means  $\boldsymbol{\mu}_{i,HVG}$  and vector genewise dispersions  $\boldsymbol{\theta}_{i,HVG}$  are given below,

548

549

$$\boldsymbol{\mu}_{i,HVG} = s_i \times \exp(\mathbf{W}_{\mu,HVG} \times \tilde{\mathbf{z}}_{i,HVG}),$$

550 
$$\boldsymbol{\theta}_{i,HVG} = \text{softplus}(\mathbf{W}_{\theta,HVG} \times \tilde{\mathbf{z}}_{i,HVG}),$$

551

552 where  $s_i$  is the size factor for cell  $i$ ,  $\mathbf{W}_{\mu,HVG}$  and  $\mathbf{W}_{\theta,HVG}$  are trainable weight matrices, and  $\exp$  and  
553  $\text{softplus}$  are activation functions that are applied elementwise. For each gene  $j$  in cell  $i$ , we compute  
554 the negative log likelihood of the negative binomial distribution as

555

556 
$$l_{ij} = -\log\left(\frac{\Gamma(x_{ij} + \theta_{ij})}{\Gamma(\theta_{ij})} \left(\frac{\theta_{ij}}{\theta_{ij} + \mu_{ij}}\right)^{\theta_{ij}} \left(\frac{\mu_{ij}}{\theta_{ij} + x_{ij}}\right)^{x_{ij}}\right),$$

557

558 where  $x_{ij}$  is the original count in HVG gene  $j$  for cell  $i$ ,  $\mu_{ij}$  and  $\theta_{ij}$  are the  $j^{\text{th}}$  elements of  $\boldsymbol{\mu}_{i,HVG}$  and  
559  $\boldsymbol{\theta}_{i,HVG}$ , respectively. For the HVG count model, the full loss for cell  $i$  is then  $l_i = \frac{1}{p_{HVG}} \sum_{j=1}^{p_{HVG}} l_{ij}$ . The loss

560 for the LVG count model can be similarly defined. Both the HVG and LVG count models are trained using  
561 their own early stopping and learning rate decay convergence monitoring.

562

### 563 **Evaluation of batch effect removal in the gene expression space and the embedding space**

564 Here, we briefly describe the workflow to evaluate batch effect removal and comparison between  
565 different methods (details see **Supplementary Notes 2 and 3**). First, we evaluated the performance of  
566 different methods in removing batch effect in the gene expression space. For this evaluation, we  
567 considered CarDEC, scVI, DCA, and MNN. We ran all denoising/batch correction methods on the full data  
568 matrix and then present clustering results for denoised HVGs and denoised LVGs separately by subsetting  
569 the HVGs and LVGs from the full denoised/batch corrected expression matrix. The subsetted matrix that  
570 includes only the HVGs (or LVGs) is then passed down to the Louvain's clustering algorithm. All steps in  
571 this workflow are identical for both the HVGs and the LVGs, and all methods used the same HVGs and  
572 LVGs as input for clustering. Furthermore, on a given dataset, we benchmarked all methods with the same

573 number of clusters. Second, we evaluated batch effect removal for the embedded representations of  
574 scRNA-seq. For this evaluation we considered CarDEC, scVI, DCA, and scDeepCluster. We excluded MNN  
575 since it has no embedding functionality. We also included “raw” as a control method for comparison,  
576 which is just subsetting the raw data to include only the HVGs, and then running the clustering workflow.  
577

### 578 **Coefficient of variation (CV) analysis**

579 To measure batch mixing, we examined the batchwise centroids before and after denoising. Let  $\mathbf{X}'$  be a  
580 matrix of gene expression counts (including both HVGs and LVGs).  $\mathbf{X}'$  can be the matrix of raw counts, or  
581 the denoised/batch corrected counts from any of CarDEC, scVI, DCA, or MNN. For CarDEC, we only  
582 considered denoised counts, not denoised expression in the Z-score space. If  $\mathbf{X}'$  consists of MNN corrected  
583 expression, then we did not preprocess the data since MNN denoised expression is on a cosine scale. In  
584 the case of MNN, a fraction of expression counts can be negative, which poses difficulties when computing  
585 coefficients of variation. To circumvent this issue, any MNN expression values that are negative were  
586 truncated to zero for the CV analysis. For all other methods we have denoised expression in the non-  
587 negative count space, so we performed cell normalization and log normalization on  $\mathbf{X}'$ , exactly in the same  
588 way described in the Step 1 (preprocessing) of CarDEC.

589  
590 Let  $x_{ij}'$  be the expression value in gene  $j$  of cell  $i$  in  $\mathbf{X}'$ . Let  $S_b$  be a set of integers defined such that  $i \in$   
591  $S_b$  if and only if cell  $i$  was sequenced from batch  $b$ . Furthermore, let  $c_{bj} = \sum_{i \in S_b} x_{ij}' / \sum_{i \in S_b} 1$  be the  
592 centroid (mean expression) of batch  $b$  for gene  $j$ . Let  $C_j = \{c_{bj}\}$  be the set of batch centroids for gene  $j$ .  
593 If we have  $B$  batches, then this will be a set of  $B$  numbers. We define the CV for gene  $j$  to measure the  
594 degree of batch mixing as follows:

595

596 
$$CV_j = \frac{\sqrt{\text{Var}(C_j)}}{\text{Mean}(C_j) + \gamma},$$

597

598 where  $\gamma$  is a small number included to guarantee computational stability for very lowly expressed genes.

599 We set  $\gamma = 10^{-12}$ . A higher value of  $CV_j$  corresponds to greater variation among batches and less batch

600 mixing, and a good batch effect removal method should drive  $CV_j$  closer to zero. Normalizing by mean

601 expression adjusts the CV for how highly expressed the gene is, so that CVs from more highly expressed

602 genes are comparable to CVs from less highly expressed genes.

603

#### 604 **Evaluation metrics for clustering**

605 For all of our benchmark datasets, we used the cell type labels reported in the original papers as the gold

606 standard. The clustering performance of each method was mainly evaluated using the adjusted rand index

607 (ARI), calculated as below,

608

609 
$$ARI = \frac{\sum_{ij} \binom{n_{ij}}{2} - [\sum_i \binom{a_i}{2} \sum_j \binom{b_j}{2}] / \binom{n}{2}}{\frac{1}{2} [\sum_i \binom{a_i}{2} + \sum_j \binom{b_j}{2}] - [\sum_i \binom{a_i}{2} \sum_j \binom{b_j}{2}] / \binom{n}{2}},$$

610

611 where  $n_{ij}$  is the number of cells in both cluster  $i$  from the cluster assignments obtained when

612 benchmarking and in cell type  $j$  according to the gold standard cell type labels.  $a_i$  is the total number of

613 cells in cluster  $i$  from the cluster assignments obtained when benchmarking,  $b_j$  is the total number of cells

614 in cell type  $j$  according to the gold standard cell type labels from the original study, and  $n$  is the total

615 number of cells. Additionally, we also computed normalized mutual information (NMI) and purity,

616 calculated as below,

617

618 
$$NMI = 2 \times \frac{\sum_{ij} \frac{n_{ij}}{n} \log \left( \frac{n \times n_{ij}}{a_i \times b_j} \right)}{\sum_i \frac{a_i}{n} \log \left( \frac{n}{a_i} \right) + \sum_j \frac{b_j}{n} \log \left( \frac{n}{b_j} \right)},$$

619

620 
$$Purity = \frac{1}{n} \sum_i \max_j n_{ij}.$$

621

## 622 **Data availability**

623 We analyzed multiple published scRNA-seq datasets, which are available through the accession numbers  
624 reported in the original papers. 1) Human pancreatic islet data: CelSeq (Gene Expression Omnibus  
625 GSE81076), CelSeq2 (Gene Expression Omnibus GSE85241), Fluidigm C1 (Gene Expression Omnibus  
626 GSE86469), and SMART-Seq2 (Array Express E-MTAB-5061); 2) Bipolar cells from mouse retina (Gene  
627 Expression Omnibus GSE81904); 3) Bipolar cells from macaque retina (Gene Expression Omnibus  
628 GSE118480); 4) mouse cortex data (Single Cell Portal SCP425); 5) human PBMC data (Single Cell Portal  
629 SCP424); 6) human monocyte data GEO (GSE146974); 7) human fetal liver data (Array Express E-MTAB-  
630 7407). Details of these datasets were described in **Supplementary Table 2**.

631

## 632 **Software availability**

633 An open-source implementation of the CarDEC algorithm can be downloaded from

634 <https://github.com/jlakkis/CarDEC>

635

## 636 **Life sciences reporting summary**

637 Further information on experimental design is available in the Life Sciences Reporting Summary.

## 638 **References**

- 639 1. Hicks, S.C., Townes, F.W., Teng, M. & Irizarry, R.A. Missing data and technical variability in single-  
640 cell RNA-sequencing experiments. *Biostatistics* **19**, 562-578 (2018).
- 641 2. Lahnemann, D., *et al.* Eleven grand challenges in single-cell data science. *Genome Biol* **21**, 31  
642 (2020).
- 643 3. Li, X., *et al.* Deep learning enables accurate clustering with batch effect removal in single-cell  
644 RNA-seq analysis. *Nat Commun* **11**, 2338 (2020).
- 645 4. Lopez, R., Regier, J., Cole, M.B., Jordan, M.I. & Yosef, N. Deep generative modeling for single-cell  
646 transcriptomics. *Nat Methods* **15**, 1053-1058 (2018).
- 647 5. Haghverdi, L., Lun, A.T.L., Morgan, M.D. & Marioni, J.C. Batch effects in single-cell RNA-  
648 sequencing data are corrected by matching mutual nearest neighbors. *Nat Biotechnol* **36**, 421-  
649 427 (2018).
- 650 6. Stuart, T., *et al.* Comprehensive Integration of Single-Cell Data. *Cell* **177**, 1888-1902 e1821  
651 (2019).
- 652 7. Korsunsky, I., *et al.* Fast, sensitive and accurate integration of single-cell data with Harmony. *Nat*  
653 *Methods* **16**, 1289-1296 (2019).
- 654 8. Welch, J.D., *et al.* Single-Cell Multi-omic Integration Compares and Contrasts Features of Brain  
655 Cell Identity. *Cell* **177**, 1873-1887 e1817 (2019).
- 656 9. Barkas, N., *et al.* Joint analysis of heterogeneous single-cell RNA-seq dataset collections. *Nat*  
657 *Methods* **16**, 695-698 (2019).
- 658 10. Polanski, K., *et al.* BBKNN: fast batch alignment of single cell transcriptomes. *Bioinformatics* **36**,  
659 964-965 (2020).
- 660 11. Lucken, M.D., *et al.* Benchmarking atlas-level data integration in single-cell genomics. *bioRxiv*  
661 (2020).

- 662 12. Eraslan, G., Simon, L.M., Mircea, M., Mueller, N.S. & Theis, F.J. Single-cell RNA-seq denoising  
663 using a deep count autoencoder. *Nat Commun* **10**, 390 (2019).
- 664 13. Tian, T., Ji, W., Qi, S. & Wei, Z. Clustering single-cell RNA-seq data with a model-based deep  
665 learning approach. *Nature Machine Intelligence* **1**, 191-198 (2019).
- 666 14. Guo, X., Gao, L., Liu, X. & Yin, J. Improved deep embedded clustering with local structure  
667 preservation. *Proceedings of the Twenty-Sixth International Joint Conference on Artificial*  
668 *Intelligence*, 1753-1759 (2017).
- 669 15. Lawlor, N., *et al.* Single-cell transcriptomes identify human islet cell signatures and reveal cell-  
670 type-specific expression changes in type 2 diabetes. *Genome Res* **27**, 208-222 (2017).
- 671 16. Segerstolpe, A., *et al.* Single-Cell Transcriptome Profiling of Human Pancreatic Islets in Health  
672 and Type 2 Diabetes. *Cell Metab* **24**, 593-607 (2016).
- 673 17. Grun, D., *et al.* De Novo Prediction of Stem Cell Identity using Single-Cell Transcriptome Data.  
674 *Cell Stem Cell* **19**, 266-277 (2016).
- 675 18. Muraro, M.J., *et al.* A Single-Cell Transcriptome Atlas of the Human Pancreas. *Cell Syst* **3**, 385-  
676 394 e383 (2016).
- 677 19. Peng, Y.R., *et al.* Molecular Classification and Comparative Taxonomics of Foveal and Peripheral  
678 Cells in Primate Retina. *Cell* **176**, 1222-1237 e1222 (2019).
- 679 20. Ding, J., *et al.* Systematic comparison of single-cell and single-nucleus RNA-sequencing methods.  
680 *Nat Biotechnol* **38**, 737-746 (2020).
- 681 21. Cao, J., *et al.* The single-cell transcriptional landscape of mammalian organogenesis. *Nature* **566**,  
682 496-502 (2019).
- 683 22. Wong, K.L., *et al.* Gene expression profiling reveals the defining features of the classical,  
684 intermediate, and nonclassical human monocyte subsets. *Blood* **118**, e16-31 (2011).
- 685 23. Popescu, D.M., *et al.* Decoding human fetal liver haematopoiesis. *Nature* **574**, 365-371 (2019).

- 686 24. Stuart, T., *et al.* Comprehensive integration of single-cell data. *Cell* **177**, 1888-1902. e1821  
687 (2019).
- 688 25. Wolf, F.A., Angerer, P. & Theis, F.J. SCANPY: large-scale single-cell gene expression data analysis.  
689 *Genome biology* **19**, 15 (2018).
- 690 26. Kingma, D.P. & Ba, J.L. ADAM: a method for stochastic optimization. *International Conference on*  
691 *Learning Representation* (2015).
- 692 27. Xie, J., Girshick, R. & Farhadi, A. Unsupervised deep embedding for clustering analysis.  
693 *Proceedings of International Conference on Machine Learning*, 478-487 (2016).
- 694 28. Svensson, V. Droplet scRNA-seq is not zero-inflated. *Nat Biotechnol* **38**, 147-150 (2020).
- 695 29. Wang, J., *et al.* Gene expression distribution deconvolution in single-cell RNA sequencing. *Proc*  
696 *Natl Acad Sci U S A* **115**, E6437-E6446 (2018).
- 697 30. Chen, W., *et al.* UMI-count modeling and differential expression analysis for single-cell RNA  
698 sequencing. *Genome Biol* **19**, 70 (2018).
- 699  
700



701 **Figure 1**  
702

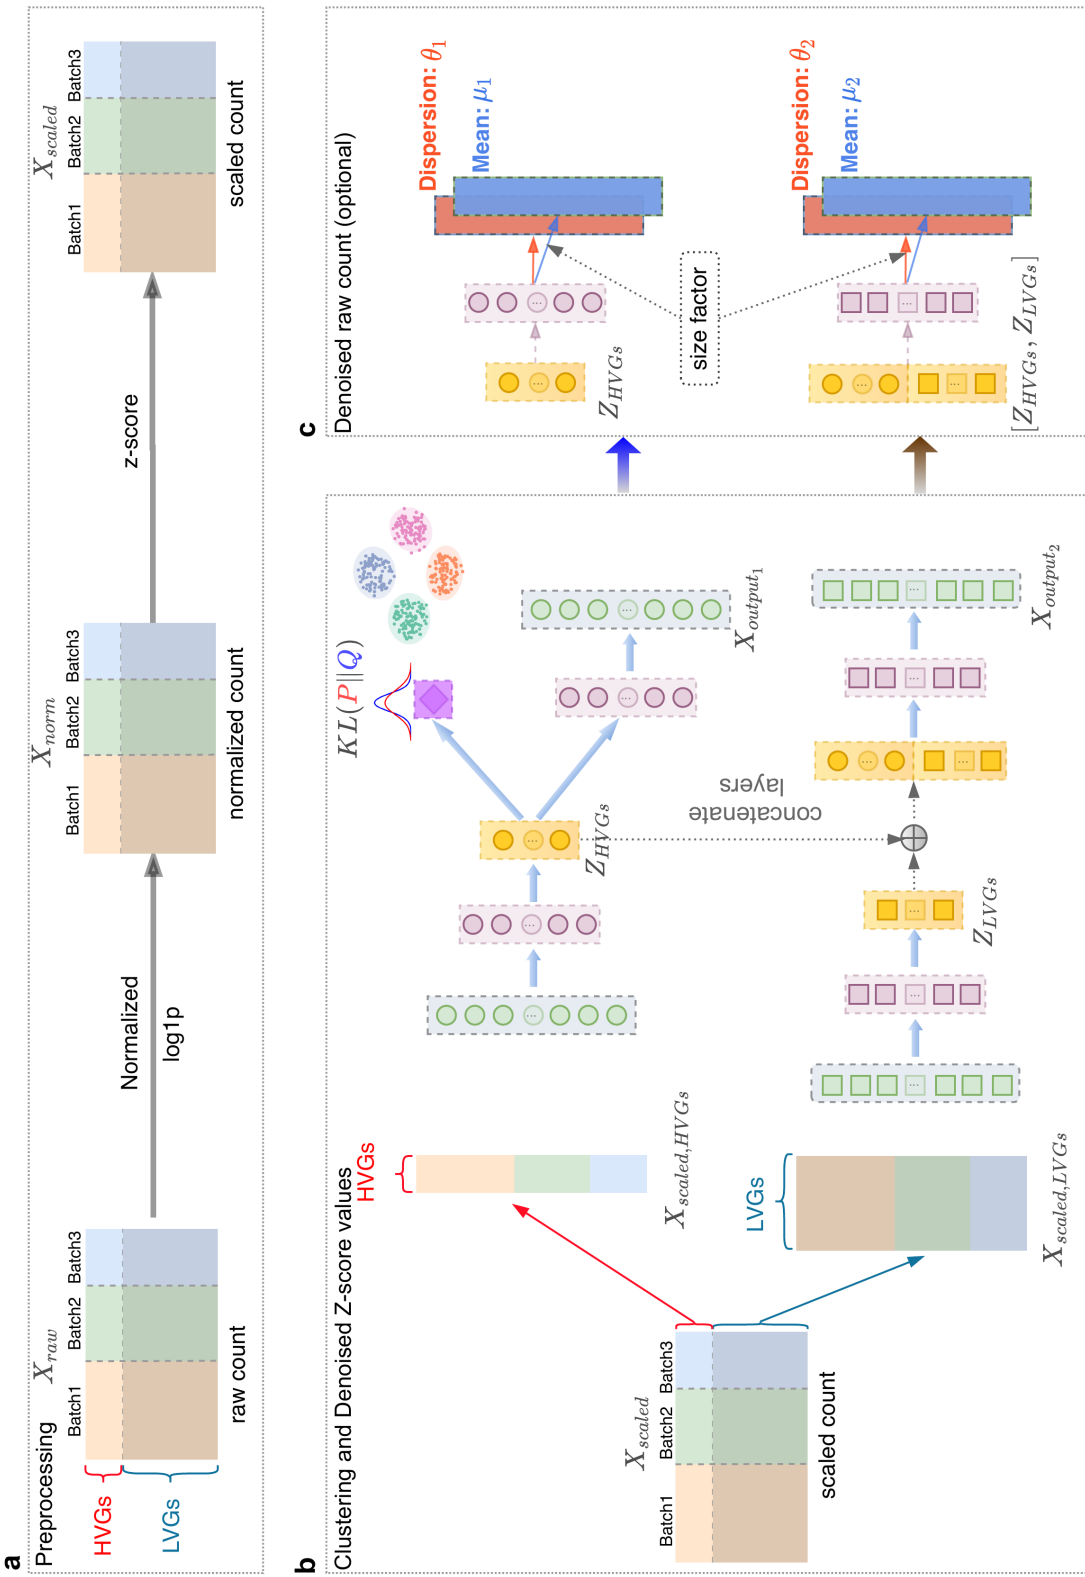

703

704  
705

**Figure 2**

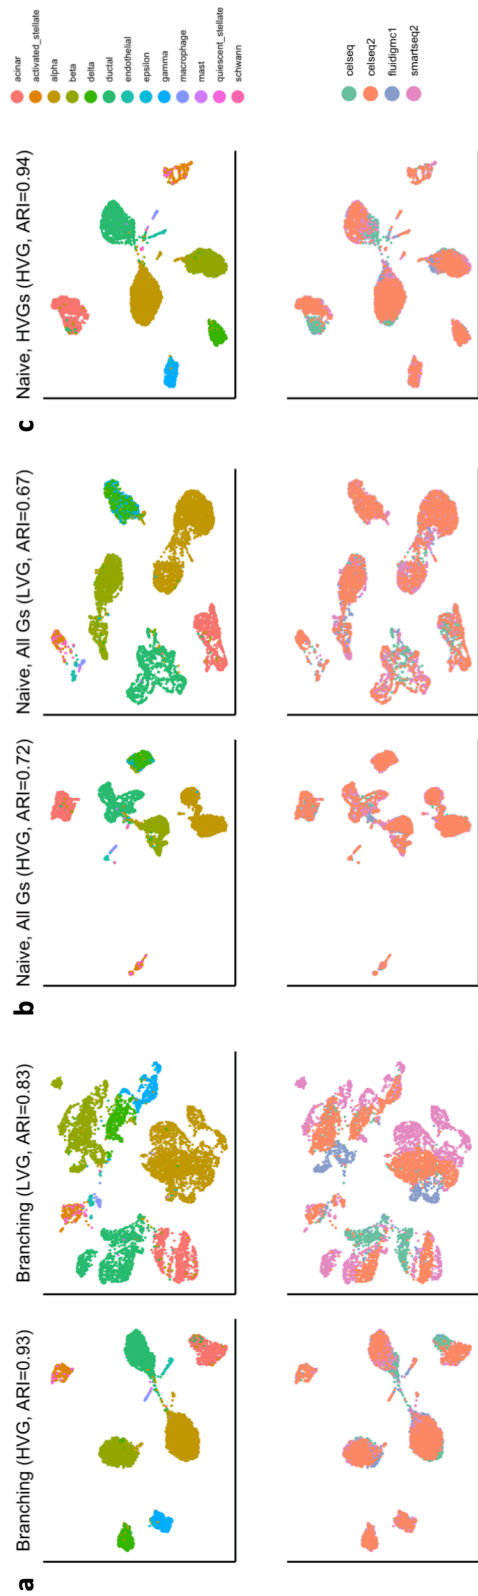

706  
707

708 **Figure 3**  
709

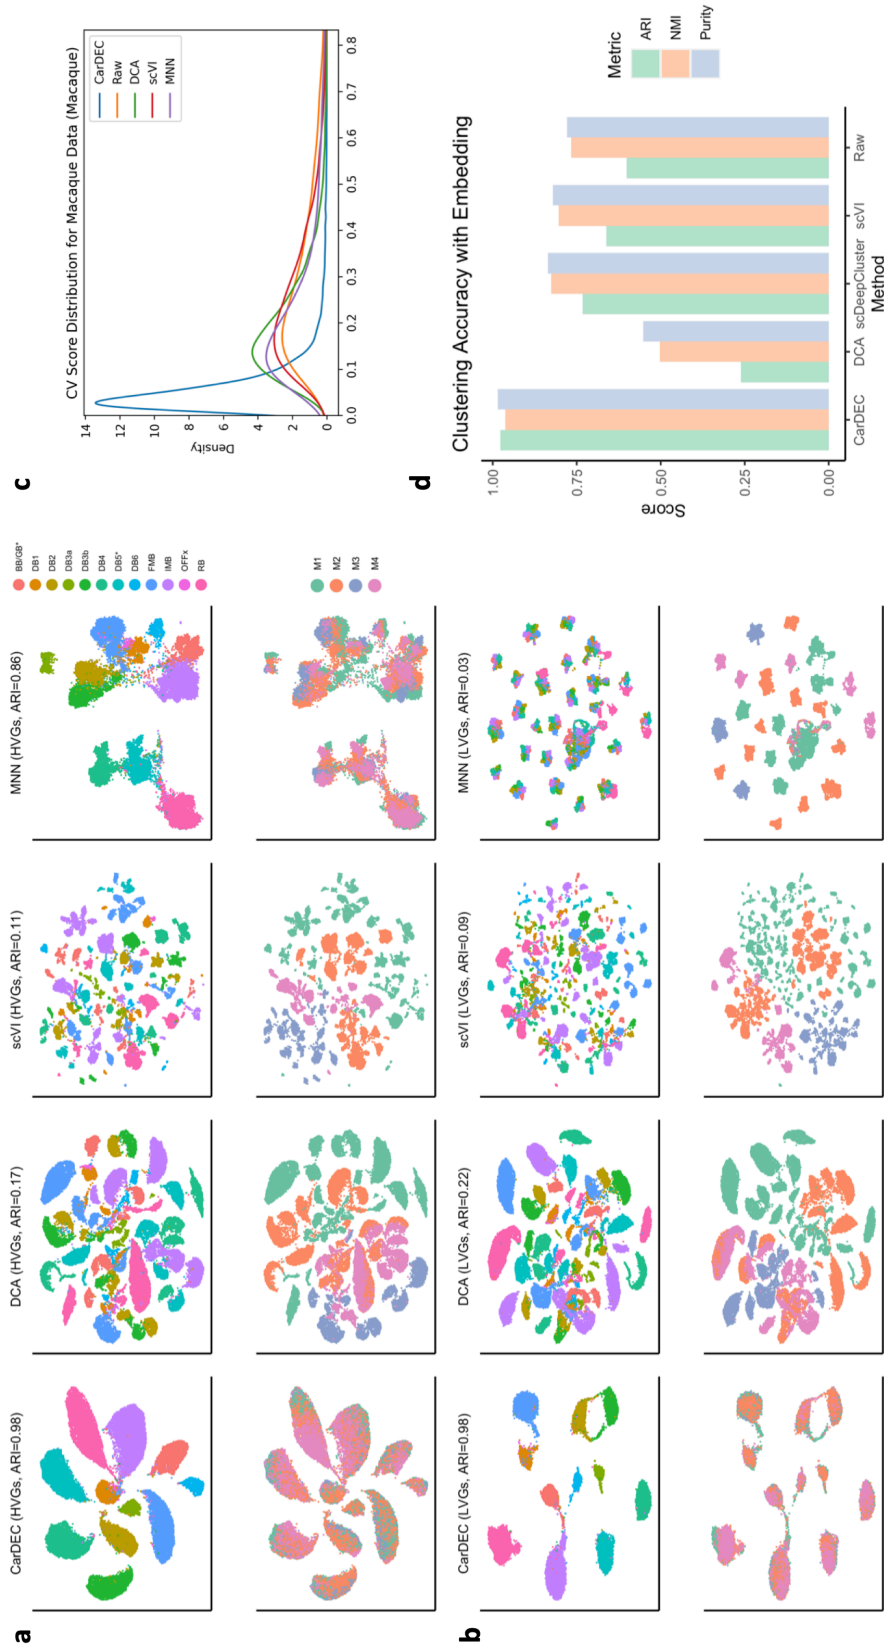

710

711 **Figure 4**  
712

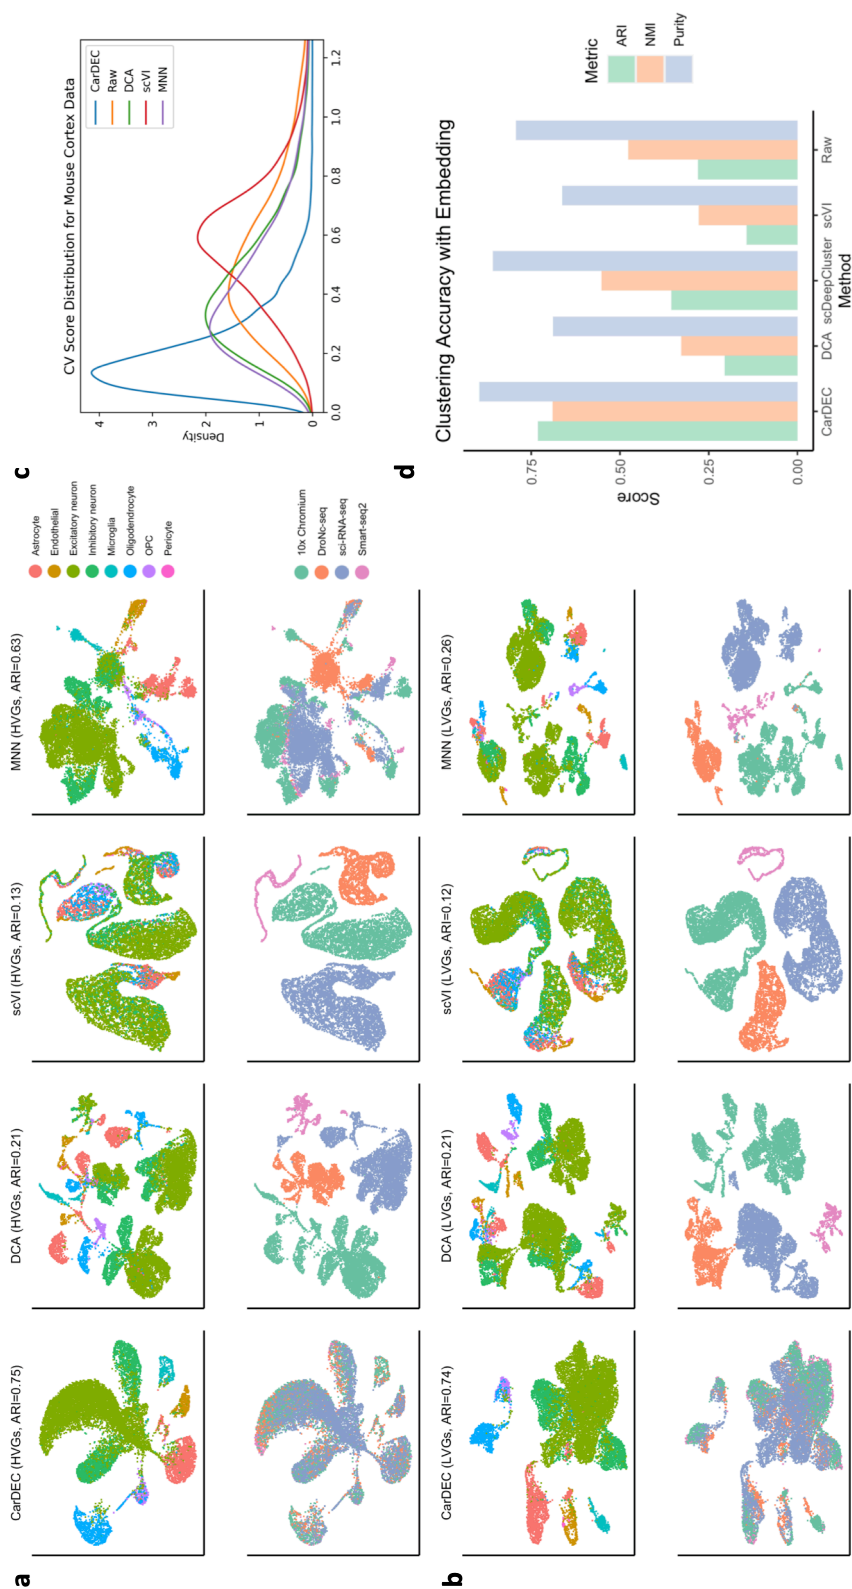

713  
714

715 **Figure 5**  
716

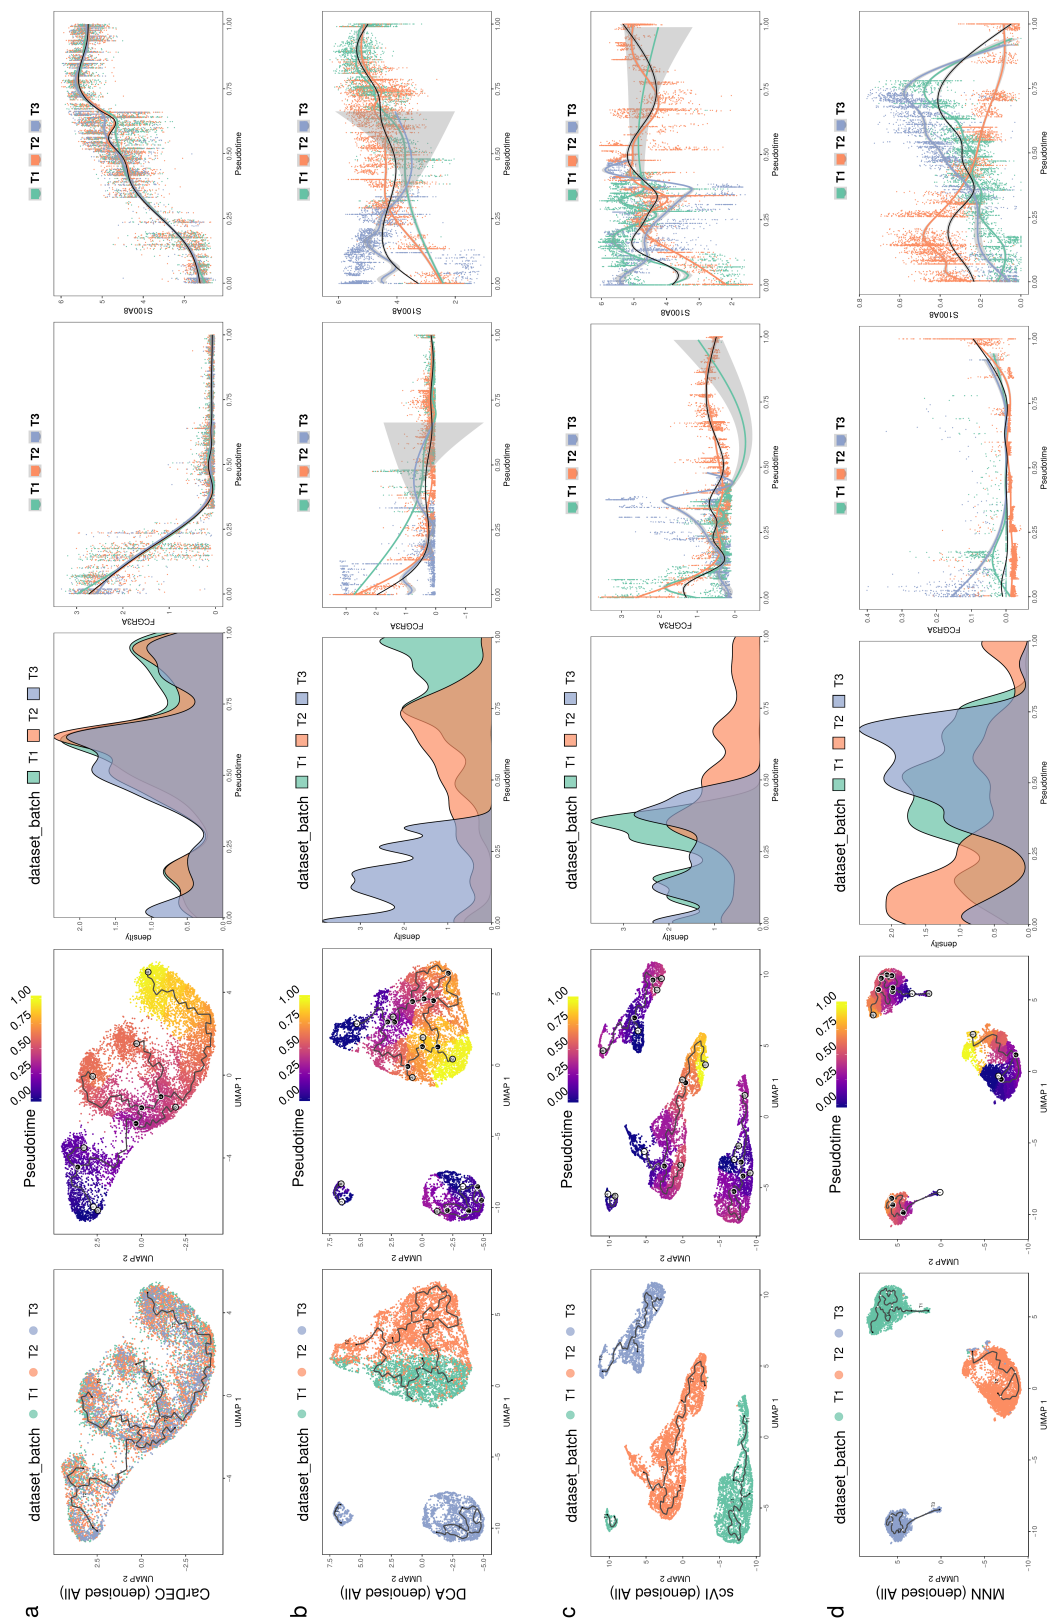

717  
718

719  
720

Figure 6

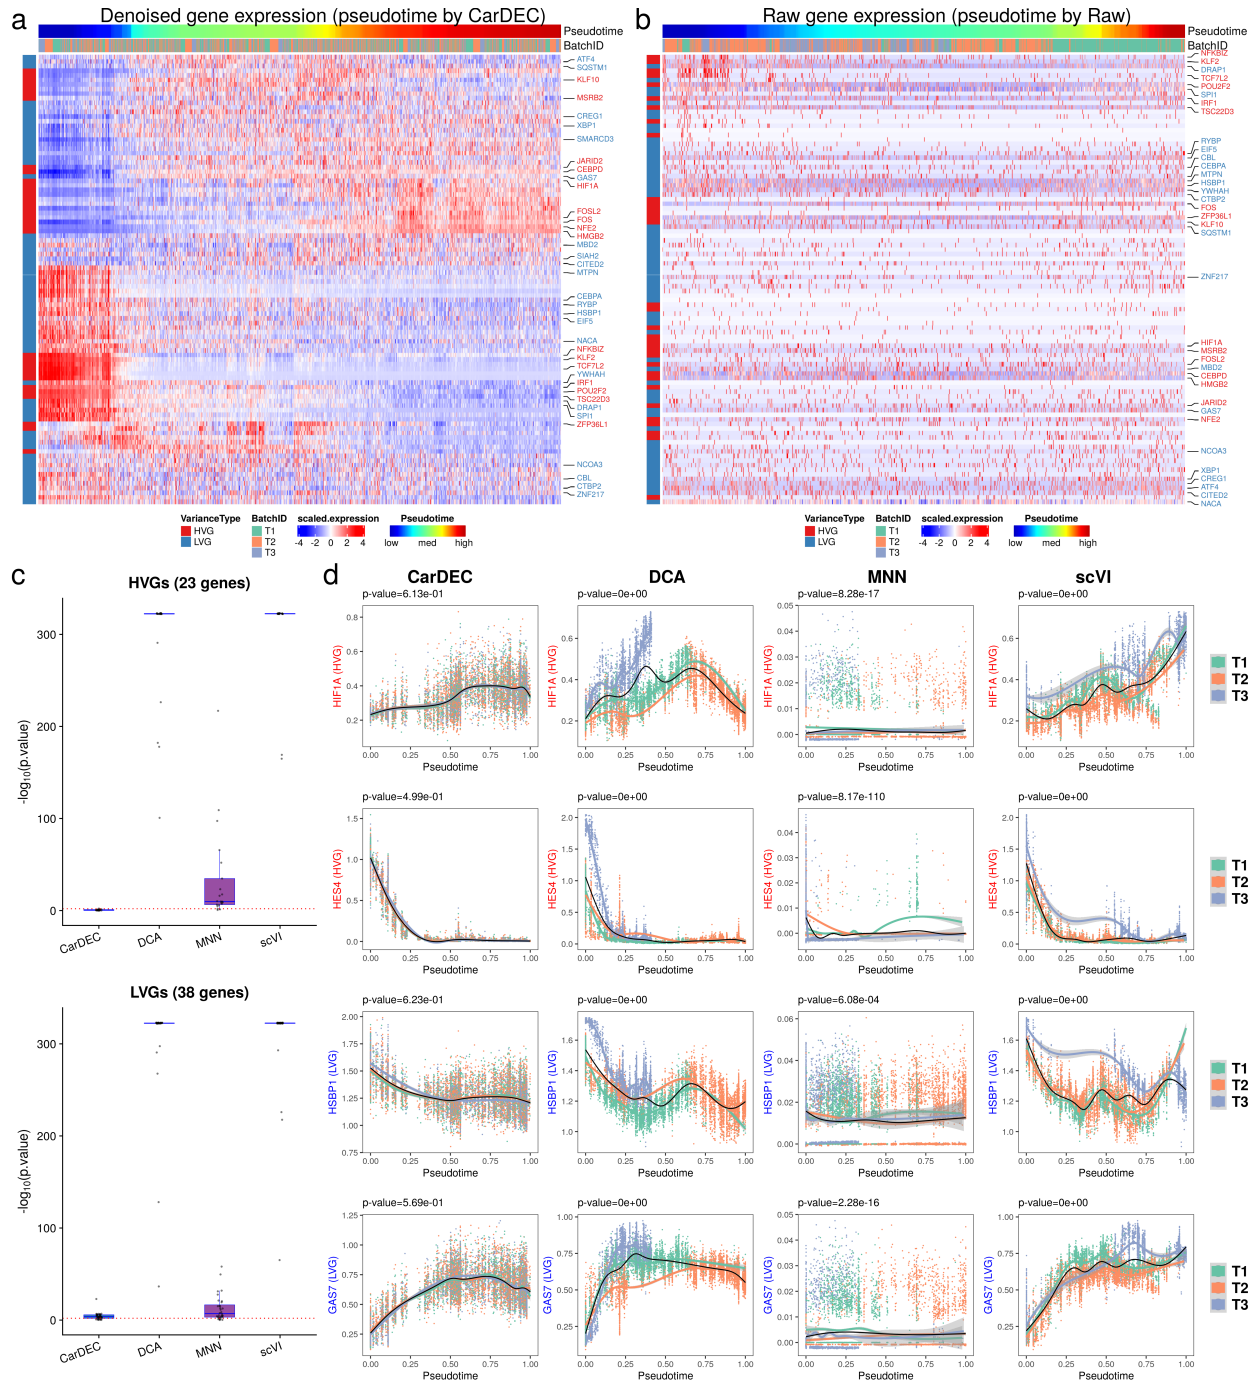

721
